# Supplementary material
Source: PubMed Central journal article supplement (PMC3294313)
Supplement: ASN.2011060607_ASN2011060607SupplementaryData.pdf [file ASN.2011060607_ASN2011060607SupplementaryData.pdf]

Appendix Table 1a. Data sources for developing countries

|    | Country                              | Source                                                                                                                                                                  | Source type                                |
|----|--------------------------------------|-------------------------------------------------------------------------------------------------------------------------------------------------------------------------|--------------------------------------------|
| 1  | Algeria                              | Sudan Peritoneal Dialysis Program <sup>41</sup> and Charles Nicolle Hospital (Ben Abdallah, T. Tunis, Tunisia. August 2008)                                             | Journal article and personal communication |
| 2  | Angola                               | Sudan Peritoneal Dialysis Program <sup>41</sup>                                                                                                                         | Journal article                            |
| 3  | Antigua and Barbuda                  | Caribbean Renal Registry <sup>42</sup>                                                                                                                                  | Report                                     |
| 4  | Argentina                            | Argentina Society of Nephrology <sup>43</sup>                                                                                                                           | Report                                     |
| 5  | Armenia                              | Arabkir Joint Medical Centre (Sarkissian, A. Yerevan, Armenia. July 2010)                                                                                               | Personal communication                     |
| 6  | Azerbaijan                           | Azerbaijan Republic Ministry of Health (Rehimova, L. Azerbaijan Republic. July 2008)                                                                                    | Personal communication                     |
| 7  | Bahamas                              | Caribbean Renal Registry <sup>42</sup>                                                                                                                                  | Report                                     |
| 8  | Bangladesh                           | Kidney Foundation of Bangladesh (Ur-Rashid, H. Dhaka, Bangladesh. July 2010)                                                                                            | Personal communication                     |
| 9  | Barbados                             | Caribbean Renal Registry <sup>42</sup>                                                                                                                                  | Report                                     |
| 10 | Belarus                              | The Belarusian Medical Academy of Postgraduate Education - Nephrology Division (Komisarov, K. Minsk, Belarus. June 2008)                                                | Personal communication                     |
| 11 | Benin                                | Sudan Peritoneal Dialysis Program <sup>41</sup> and Charles Nicolle Hospital (Ben Abdallah, T. Tunis, Tunisia. August 2008)                                             | Journal article and personal communication |
| 12 | Bolivia                              | The Latin American Dialysis and Transplant Registry <sup>11</sup> (Cusumano, A. Buenos Aires, Argentina. August 2010)                                                   | Report and personal communication          |
| 13 | Bosnia and Herzegovina               | Bosnian Renal Registry <sup>44</sup> (Mesic, E. Sarajevo, Bosnia. May 2008) and European Renal Association - European Dialysis and Transplant Association <sup>13</sup> | Report and personal communication          |
| 14 | Brazil                               | Brazilian Society of Nephrology (Egidio Romao, J. and Zatz, R. São Paulo, Brazil. September 2009)                                                                       | Personal communication                     |
| 15 | British Virgin Islands (BVI)         | Caribbean Renal Registry <sup>42</sup>                                                                                                                                  | Report                                     |
| 16 | Brunei Darussalam                    | Brunei Darussalam Ministry of Health <sup>45</sup>                                                                                                                      | Report                                     |
| 17 | Bulgaria                             | National Program for Nephrology and Dialysis <sup>46</sup> and ISN-COMGAN Central and Eastern European Committee (Vazelov, E. Sofia, Bulgaria. July 2010)               | Journal article and personal communication |
| 18 | Cameroon                             | Sudan Peritoneal Dialysis Program <sup>41</sup> and Charles Nicolle Hospital (Ben Abdallah, T. Tunis, Tunisia. August 2008)                                             | Journal article and personal communication |
| 19 | Cayman Islands                       | Caribbean Renal Registry <sup>42</sup>                                                                                                                                  | Report                                     |
| 20 | Chile                                | The Latin American Dialysis and Transplant Registry <sup>11</sup> (Cusumano, A. Buenos Aires, Argentina. August 2010)                                                   | Report and personal communication          |
| 21 | China                                | Baxter Renal Asia Pacific (Industry representatives. Shanghai, China. July 2008) and Tung Wah Hospital <sup>47</sup>                                                    | Journal article and personal communication |
| 22 | Colombia                             | The Latin American Dialysis and Transplant Registry <sup>11</sup> (Cusumano, A. Buenos Aires, Argentina. August 2010)                                                   | Report and personal communication          |
| 23 | Costa Rica                           | The Latin American Dialysis and Transplant Registry <sup>11</sup> (Cusumano, A. Buenos Aires, Argentina. August 2010)                                                   | Report and personal communication          |
| 24 | Côte d'Ivoire                        | Sudan Peritoneal Dialysis Program <sup>41</sup> and Charles Nicolle Hospital (Ben Abdallah, T. Tunis, Tunisia. August 2008)                                             | Journal article and personal communication |
| 25 | Croatia                              | European Renal Association - European Dialysis and Transplant Association <sup>13</sup>                                                                                 | Report                                     |
| 26 | Cuba                                 | The Latin American Dialysis and Transplant Registry <sup>11</sup> (Cusumano, A. Buenos Aires, Argentina. August 2010)                                                   | Report and personal communication          |
| 27 | Czech Republic                       | European Renal Association - European Dialysis and Transplant Association <sup>13</sup>                                                                                 | Report                                     |
| 28 | Democratic Republic of Congo (Congo) | Nephrology Unit: University of Kinshasa <sup>48</sup> (Sumaili, EK. Kinshasa, Democratic Republic of Congo. July 2008)                                                  | Journal article and personal communication |
| 29 | Dominican Republic                   | The Latin American Dialysis and Transplant Registry <sup>11</sup> (Cusumano, A. Buenos Aires, Argentina. August 2010)                                                   | Report and personal communication          |
| 30 | Ecuador                              | The Latin American Dialysis and Transplant Registry <sup>11</sup> (Cusumano, A. Buenos Aires, Argentina. August 2010)                                                   | Report and personal communication          |

|    |                                                                |                                                                                                                                                                                                                     |                                            |
|----|----------------------------------------------------------------|---------------------------------------------------------------------------------------------------------------------------------------------------------------------------------------------------------------------|--------------------------------------------|
| 31 | Egypt                                                          | The Egyptian Renal Registry <sup>49 50</sup>                                                                                                                                                                        | Report and journal article                 |
| 32 | El Salvador                                                    | The Latin American Dialysis and Transplant Registry <sup>11</sup> (Cusumano, A. Buenos Aires, Argentina. August 2010)                                                                                               | Report and personal communication          |
| 33 | Estonia                                                        | Estonian Renal Registry (Rosenberg, M. Tartu, Estonia. August 2008) and European Renal Association - European Dialysis and Transplant Association <sup>13</sup>                                                     | Report and personal communication          |
| 34 | Ethiopia                                                       | Sudan Peritoneal Dialysis Program <sup>41</sup>                                                                                                                                                                     | Journal article                            |
| 35 | the Former Yugoslav Republic of Macedonia ( <i>Macedonia</i> ) | European Renal Association - European Dialysis and Transplant Association <sup>13</sup>                                                                                                                             | Report                                     |
| 36 | Gabon                                                          | Sudan Peritoneal Dialysis Program <sup>41</sup> and Charles Nicolle Hospital (Ben Abdallah, T. Tunis, Tunisia. August 2008)                                                                                         | Journal article and personal communication |
| 37 | Georgia                                                        | Kidney Transplantation Union of Georgia (Tchokhanelidze, I. Tbilisi, Georgia. August 2010)                                                                                                                          | Personal communication                     |
| 38 | Ghana                                                          | Sudan Peritoneal Dialysis Program <sup>41</sup> and Charles Nicolle Hospital (Ben Abdallah, T. Tunis, Tunisia. August 2008)                                                                                         | Journal article and personal communication |
| 39 | Guatemala                                                      | The Latin American Dialysis and Transplant Registry <sup>11</sup> (Cusumano, A. Buenos Aires, Argentina. August 2010)                                                                                               | Report and personal communication          |
| 40 | Honduras                                                       | The Latin American Dialysis and Transplant Registry <sup>11</sup> (Cusumano, A. Buenos Aires, Argentina. August 2010)                                                                                               | Report and personal communication          |
| 41 | Hungary                                                        | St. Margit Hospital: Department of Nephrology and Dialysis Unit (Harris, A. Budapest, Hungary. August 2010)                                                                                                         | Personal communication                     |
| 42 | India                                                          | Sri Ramachandra Medical College and Research Institute <sup>51;52</sup>                                                                                                                                             | Journal article                            |
| 43 | Indonesia                                                      | University of Indonesia <sup>53</sup>                                                                                                                                                                               | Journal article                            |
| 44 | Iran                                                           | Management Center for Transplantation and Special Diseases <sup>54</sup> (Mahdavi-Mazdeh, M. Tehran, Iran. September 2008)                                                                                          | Report and personal communication          |
| 45 | Jamaica                                                        | Caribbean Renal Registry <sup>42</sup>                                                                                                                                                                              | Report                                     |
| 46 | Jordan                                                         | Jordan Society of Nephrology (Suheimat, T. Amman, Jordan. August 2010)                                                                                                                                              | Personal communication                     |
| 47 | Kenya                                                          | Sudan Peritoneal Dialysis Program <sup>41</sup>                                                                                                                                                                     | Journal article                            |
| 48 | Kuwait                                                         | Tehran University of Medical Sciences: Shafa CAPD Research Center and Urology Research Center <sup>34</sup>                                                                                                         | Journal article                            |
| 49 | Latvia                                                         | European Renal Association - European Dialysis and Transplant Association <sup>13</sup>                                                                                                                             | Report                                     |
| 50 | Lebanon                                                        | Tehran University of Medical Sciences: Shafa CAPD Research Center and Urology Research Center <sup>34</sup>                                                                                                         | Journal article                            |
| 51 | Libya                                                          | Sudan Peritoneal Dialysis Program <sup>41</sup>                                                                                                                                                                     | Journal article                            |
| 52 | Lithuania                                                      | Lithuanian Association of Nephrology, Dialysis and Transplantation (Kuzminskis, V. Kaunas, Lithuania. July 2008)                                                                                                    | Personal communication                     |
| 53 | Madagascar                                                     | Sudan Peritoneal Dialysis Program <sup>41</sup>                                                                                                                                                                     | Journal article                            |
| 54 | Malaysia                                                       | The National Renal Registry <sup>55</sup> (Day Guat, L. Kuala Lumpur, Malaysia. July 2008)                                                                                                                          | Report and personal communication          |
| 55 | Maldives                                                       | Sri Ramachandra Medical College and Research Institute <sup>52</sup>                                                                                                                                                | Journal article                            |
| 56 | Mali                                                           | Sudan Peritoneal Dialysis Program <sup>41</sup> and Charles Nicolle Hospital (Ben Abdallah, T. Tunis, Tunisia. August 2008)                                                                                         | Journal article and personal communication |
| 57 | Mauritania                                                     | Sudan Peritoneal Dialysis Program <sup>41</sup> and Charles Nicolle Hospital (Ben Abdallah, T. Tunis, Tunisia. August 2008)                                                                                         | Journal article and personal communication |
| 58 | Mauritius                                                      | Sudan Peritoneal Dialysis Program <sup>41</sup>                                                                                                                                                                     | Journal article                            |
| 59 | Mexico                                                         | The Latin American Dialysis and Transplant Registry <sup>11</sup> (Cusumano, A. Buenos Aires, Argentina. August 2010) and Jalisco Dialysis and Transplant Registry (García-García, G. Jalisco, Mexico. August 2008) | Report and personal communication          |
| 60 | Moldova                                                        | Moldova Kidney Foundation (Codreanu, I. Moldova. August 2008)                                                                                                                                                       | Personal communication                     |
| 61 | Morocco                                                        | Sudan Peritoneal Dialysis Program <sup>41</sup>                                                                                                                                                                     | Journal article                            |
| 62 | Myanmar                                                        | Sri Ramachandra Medical College and Research Institute <sup>52</sup>                                                                                                                                                | Journal article                            |
| 63 | Nepal                                                          | BP Koirala Institute of Health Sciences (Sharma, S. Dharan, Nepal. September 2008)                                                                                                                                  | Personal communication                     |
| 64 | Nicaragua                                                      | The Latin American Dialysis and Transplant Registry <sup>11</sup> (Cusumano, A. Buenos Aires, Argentina. August 2010)                                                                                               | Report and personal communication          |

|     |                            |                                                                                                                                                                                   |                                                    |
|-----|----------------------------|-----------------------------------------------------------------------------------------------------------------------------------------------------------------------------------|----------------------------------------------------|
| 65  | Nigeria                    | Sudan Peritoneal Dialysis Program <sup>41</sup>                                                                                                                                   | Journal article                                    |
| 66  | Oman                       | Royal Hospital: Department of Nephrology (Mohsin, N. Seeb, Oman. July 2010)                                                                                                       | Personal communication                             |
| 67  | Pakistan                   | The Kidney Foundation of Pakistan <sup>56</sup>                                                                                                                                   | Report                                             |
| 68  | Panama                     | The Latin American Dialysis and Transplant Registry <sup>11</sup> (Cusumano, A. Buenos Aires, Argentina. August 2010)                                                             | Report and personal communication                  |
| 69  | Paraguay                   | The Latin American Dialysis and Transplant Registry <sup>11</sup> (Cusumano, A. Buenos Aires, Argentina. August 2010)                                                             | Report and personal communication                  |
| 70  | Peru                       | The Latin American Dialysis and Transplant Registry <sup>11</sup> (Cusumano, A. Buenos Aires, Argentina. August 2010)                                                             | Report and personal communication                  |
| 71  | Philippines                | Philippines Renal Disease Registry (Padilla, B. Quezon City, Philippines. September 2008)                                                                                         | Personal communication                             |
| 72  | Poland                     | European Renal Association - European Dialysis and Transplant Association <sup>13</sup>                                                                                           | Report                                             |
| 73  | Puerto Rico                | United States Renal Data System <sup>12</sup>                                                                                                                                     | Report                                             |
| 74  | Qatar                      | Hamad Medical Corporation: Nephrology Division <sup>57</sup>                                                                                                                      | Journal article                                    |
| 75  | Romania                    | European Renal Association - European Dialysis and Transplant Association <sup>13</sup>                                                                                           | Report                                             |
| 76  | Russia                     | European Renal Association - European Dialysis and Transplant Association <sup>13</sup>                                                                                           | Report                                             |
| 77  | Saint Lucia                | Caribbean Renal Registry <sup>42</sup>                                                                                                                                            | Report                                             |
| 78  | Saudi Arabia               | Saudi Center for Organ Transplantation <sup>58</sup>                                                                                                                              | Report                                             |
| 79  | Senegal                    | Sudan Peritoneal Dialysis Program <sup>41</sup>                                                                                                                                   | Journal article                                    |
| 80  | Serbia and Montenegro      | European Renal Association - European Dialysis and Transplant Association <sup>13</sup>                                                                                           | Report                                             |
| 81  | Slovakia                   | European Renal Association - European Dialysis and Transplant Association <sup>13</sup>                                                                                           | Report                                             |
| 82  | South Africa               | Sudan Peritoneal Dialysis Program <sup>41</sup> and Charles Nicolle Hospital (Ben Abdallah, T. Tunis, Tunisia. August 2008)                                                       | Journal article and personal communication         |
| 83  | Sri Lanka                  | Sri Ramachandra Medical College and Research Institute <sup>52</sup>                                                                                                              | Journal article                                    |
| 84  | Sudan                      | Sudan Peritoneal Dialysis Program <sup>41</sup> (Elamin, S. Khartoum, Sudan. July 2008)                                                                                           | Journal article and personal communication         |
| 85  | Swaziland                  | Sudan Peritoneal Dialysis Program <sup>41</sup>                                                                                                                                   | Journal article                                    |
| 86  | Syria                      | Syrian Society of Nephrology (Saeed, B. Damascus, Syria. August 2008)                                                                                                             | Personal communication                             |
| 87  | Tanzania                   | Sudan Peritoneal Dialysis Program <sup>41</sup>                                                                                                                                   | Journal article                                    |
| 88  | Thailand                   | Thailand Renal Replacement Therapy Registry <sup>59;60</sup>                                                                                                                      | Journal article and report                         |
| 89  | Togo                       | Sudan Peritoneal Dialysis Program <sup>41</sup> and Charles Nicolle Hospital (Ben Abdallah, T. Tunis, Tunisia. August 2008)                                                       | Journal article and personal communication         |
| 90  | Trinidad and Tobago        | Caribbean Renal Registry <sup>42</sup>                                                                                                                                            | Report                                             |
| 91  | Tunisia                    | European Renal Association - European Dialysis and Transplant Association <sup>13</sup> and Charles Nicolle Hospital <sup>61</sup> (Ben Abdallah, T. Tunis, Tunisia. August 2008) | Report, journal article and personal communication |
| 92  | Turkey                     | European Renal Association - European Dialysis and Transplant Association <sup>13</sup>                                                                                           | Report                                             |
| 93  | Turks and Caicos Islands   | Caribbean Renal Registry <sup>42</sup>                                                                                                                                            | Report                                             |
| 94  | Ukraine                    | European Renal Association - European Dialysis and Transplant Association <sup>13</sup>                                                                                           | Report                                             |
| 95  | United Arab Emirates (UAE) | Emirates Medical Association Nephrology Society (AlRukhaimi, MN. Dubai, United Arab Emirates. June 2008)                                                                          | Personal communication                             |
| 96  | Uruguay                    | Uruguayan Dialysis Registry <sup>62</sup> (González Bedat, MC. Montevideo, Uruguay. August 2008)                                                                                  | Report and personal communication                  |
| 97  | Uzbekistan                 | Tashkent City Nephrology Center (Tashkent City, Uzbekistan. October 2008)                                                                                                         | Personal communication                             |
| 98  | Venezuela                  | The Latin American Dialysis and Transplant Registry <sup>11</sup> (Cusumano, A. Buenos Aires, Argentina. August 2010)                                                             | Report and personal communication                  |
| 99  | Viet Nam                   | University Training Center for Health Care Professionals: Nephrology–Urology–Transplantation Center <sup>63</sup>                                                                 | Journal article                                    |
| 100 | Yemen                      | The Renal Diseases Friendship Society (Sheiban, AK. Sana, Yemen. July 2008)                                                                                                       | Personal communication                             |

Country names in parentheses indicate abbreviations used in figures.

Appendix Table 1b. Data sources for developed countries

|    | Country                                    | Source                                                                                                                                                                                                                | Source type                         |
|----|--------------------------------------------|-----------------------------------------------------------------------------------------------------------------------------------------------------------------------------------------------------------------------|-------------------------------------|
| 1  | Australia                                  | Australia and New Zealand Dialysis and Transplant Registry <sup>14</sup>                                                                                                                                              | Report                              |
| 2  | Austria                                    | European Renal Association - European Dialysis and Transplant Association <sup>13</sup>                                                                                                                               | Report                              |
| 3  | Belgium                                    |                                                                                                                                                                                                                       |                                     |
|    | -Dutch speaking<br>( <i>Belgium (D)</i> )  | European Renal Association - European Dialysis and Transplant Association <sup>13</sup>                                                                                                                               | Report                              |
|    | -French speaking<br>( <i>Belgium (F)</i> ) | European Renal Association - European Dialysis and Transplant Association <sup>13</sup>                                                                                                                               | Report                              |
| 4  | Canada                                     | Canadian Organ Replacement Registry <sup>64</sup> (Na, Y. Ontario, Canada. September 2008)                                                                                                                            | Report and personal communication   |
| 5  | Cyprus                                     | Cyprus Ministry of Health Monitoring Unit (Athanasiadou, M. Nicosia, Cyprus. April 2009)                                                                                                                              | Personal communication              |
| 6  | Denmark                                    | Danish Nephrology Registry <sup>65</sup> and European Renal Association - European Dialysis and Transplant Association <sup>13</sup>                                                                                  | Report                              |
| 7  | Finland                                    | Finnish Registry of Kidney Diseases <sup>66</sup>                                                                                                                                                                     | Report                              |
| 8  | France                                     | European Renal Association - European Dialysis and Transplant Association <sup>13</sup>                                                                                                                               | Report                              |
| 9  | Germany                                    | European Renal Association - European Dialysis and Transplant Association <sup>13</sup>                                                                                                                               | Report                              |
| 10 | Greece                                     | Board of Registry, Coordination and Control of RRT: General Hospital of Athens (Ioannidis, GA. Athens, Greece. July 2008) and European Renal Association - European Dialysis and Transplant Association <sup>13</sup> | Report and personal communication   |
| 11 | Hong Kong                                  | Hong Kong Renal Registry <sup>67</sup> and United States Renal Data System <sup>12</sup>                                                                                                                              | Report                              |
| 12 | Iceland                                    | European Renal Association - European Dialysis and Transplant Association <sup>13</sup>                                                                                                                               | Report                              |
| 13 | Ireland                                    | Irish Nephrology Society <sup>68</sup> and Irish Kidney Association (Hand, A. Dublin, Ireland. March 2009)                                                                                                            | Report and personal communication   |
| 14 | Israel                                     | The Israel Center for Disease Control and The Israeli Society of Nephrology and Hypertension <sup>69;70</sup>                                                                                                         | Report                              |
| 15 | Italy                                      | Niguarda Ca' Granda Hospital: Service of Biostatistics <sup>36</sup> (Nichelatti, M. Milan, Italy. July 2008) and European Renal Association - European Dialysis and Transplant Association <sup>13</sup>             | Report and personal communication   |
| 16 | Japan                                      | Japanese Society of Dialysis Therapy <sup>71 72</sup>                                                                                                                                                                 | Journal article and report          |
| 17 | Luxembourg                                 | United States Renal Data System <sup>12</sup>                                                                                                                                                                         | Report                              |
| 18 | Netherlands                                | European Renal Association - European Dialysis and Transplant Association <sup>13</sup>                                                                                                                               | Report                              |
| 19 | New Zealand                                | Australia and New Zealand Dialysis and Transplant Registry (ANZDATA) <sup>14</sup>                                                                                                                                    | Report                              |
| 20 | Norway                                     | Norwegian Renal Registry <sup>73</sup> and European Renal Association - European Dialysis and Transplant Association <sup>13</sup>                                                                                    | Report                              |
| 21 | Portugal                                   | Portuguese Renal Registry <sup>74</sup> and European Renal Association - European Dialysis and Transplant Association <sup>13</sup>                                                                                   | Report                              |
| 22 | Singapore                                  | Singapore Renal Registry <sup>75</sup>                                                                                                                                                                                | Report                              |
| 23 | Slovenia                                   | Slovenian Renal Replacement Therapy Registry <sup>76</sup> and European Renal Association - European Dialysis and Transplant Association <sup>13</sup>                                                                | Report                              |
| 24 | South Korea                                | Korean Society of Nephrology <sup>77</sup> (Jin, DC. Seoul, Republic of Korea. May 2008)                                                                                                                              | Report and personal communication   |
| 25 | Spain                                      | Spanish Registry of Renal Patients <sup>78</sup>                                                                                                                                                                      | Report                              |
| 26 | Sweden                                     | Swedish Renal Registry (Schön, S. Jönköping, Sweden. September 2008) and European Renal Association - European Dialysis and Transplant Association <sup>13</sup>                                                      | Report and personal communication   |
| 27 | Switzerland                                | Swiss Association of Health Insurance <sup>79</sup> and Federal Statistical Office: Swiss Statistics <sup>80</sup>                                                                                                    | Journal article and online database |
| 28 | Taiwan                                     | United States Renal Data System <sup>12</sup>                                                                                                                                                                         | Report                              |
| 29 | United Kingdom<br>( <i>UK</i> )            | United Kingdom Renal Registry <sup>81</sup> (Ansell, D. Bristol, United Kingdom. May 2008)                                                                                                                            | Report and personal communication   |
| 30 | United States of<br>America ( <i>USA</i> ) | United States Renal Data System <sup>12</sup>                                                                                                                                                                         | Report                              |

Country names in parentheses indicate abbreviations used in figures.

Appendix Table 2. Economic status and world region of countries reported to be performing dialysis

|    | Country                                     | Economic Status         | WHO World Region | Data collected? | Year of most recent data |
|----|---------------------------------------------|-------------------------|------------------|-----------------|--------------------------|
| 1  | Albania                                     | Developing              | EUR              | No              |                          |
| 2  | Algeria                                     | Developing              | AFR              | Yes             | 2008                     |
| 3  | Angola <sup>a</sup>                         | Developing              | AFR              | Yes             | 2008                     |
| 4  | Antigua and Barbuda <sup>a</sup>            | Developing              | AMR              | Yes             | 2007                     |
| 5  | Argentina                                   | Developing              | AMR              | Yes             | 2007                     |
| 6  | Armenia                                     | Developing              | EUR              | Yes             | 2008                     |
| 7  | Australia                                   | Developed               | WPR              | Yes             | 2008                     |
| 8  | Austria                                     | Developed               | EUR              | Yes             | 2008                     |
| 9  | Azerbaijan                                  | Developing              | EUR              | Yes             | 2008                     |
| 10 | Bahamas <sup>a</sup>                        | Developing              | AMR              | Yes             | 2005                     |
| 11 | Bahrain                                     | Developing              | EMR              | No              |                          |
| 12 | Bangladesh                                  | Developing              | SEAR             | Yes             | 2008                     |
| 13 | Barbados <sup>a</sup>                       | Developing              | AMR              | Yes             | 2005                     |
| 14 | Belarus                                     | Developing              | EUR              | Yes             | 2007                     |
| 15 | Belgium – Dutch speaking region             | Developed               | EUR              | Yes             | 2008                     |
| 16 | Belgium – French speaking region            | Developed               | EUR              | Yes             | 2008                     |
| 17 | Benin                                       | Developing              | AFR              | Yes             | 2008                     |
| 18 | Bolivia <sup>a</sup>                        | Developing              | AMR              | Yes             | 2007                     |
| 19 | Bosnia and Herzegovina - Federation         | Developing              | EUR              | Yes             | 2008                     |
| 20 | Bosnia and Herzegovina - Republika Sprska   | Developing              | EUR              | Yes             | 2008                     |
| 21 | Brazil                                      | Developing              | AMR              | Yes             | 2008                     |
| 22 | British Virgin Islands <sup>a</sup>         | Developing <sup>b</sup> | AMR              | Yes             | 2007                     |
| 23 | Brunei Darussalam                           | Developing              | WPR              | Yes             | 2008                     |
| 24 | Bulgaria                                    | Developing              | EUR              | Yes             | 2005                     |
| 25 | Cameroon                                    | Developing              | AFR              | Yes             | 2008                     |
| 26 | Canada                                      | Developed               | AMR              | Yes             | 2008                     |
| 27 | Cayman Islands <sup>a</sup>                 | Developing <sup>b</sup> | AMR              | Yes             | 2007                     |
| 28 | Chile                                       | Developing              | AMR              | Yes             | 2007                     |
| 29 | China                                       | Developing              | WPR              | Yes             | 2008                     |
| 30 | Colombia                                    | Developing              | AMR              | Yes             | 2007                     |
| 31 | Costa Rica                                  | Developing              | AMR              | Yes             | 2007                     |
| 32 | Côte d'Ivoire                               | Developing              | AFR              | Yes             | 2008                     |
| 33 | Croatia                                     | Developing              | EUR              | Yes             | 2008                     |
| 34 | Cuba                                        | Developing <sup>b</sup> | AMR              | Yes             | 2007                     |
| 35 | Cyprus                                      | Developed               | EUR              | Yes             | 2007                     |
| 36 | Czech Republic                              | Developing              | EUR              | Yes             | 2008                     |
| 37 | Democratic Republic of Congo <sup>a</sup>   | Developing              | AFR              | Yes             | 2007                     |
| 38 | Denmark                                     | Developed               | EUR              | Yes             | 2008                     |
| 39 | Dominican Republic                          | Developing              | AMR              | Yes             | 2007                     |
| 40 | Ecuador                                     | Developing              | AMR              | Yes             | 2007                     |
| 41 | Egypt                                       | Developing              | EMR              | Yes             | 2008                     |
| 42 | El Salvador                                 | Developing              | AMR              | Yes             | 2007                     |
| 43 | Estonia                                     | Developing              | EUR              | Yes             | 2008                     |
| 44 | Ethiopia <sup>a</sup>                       | Developing              | AFR              | Yes             | 2008                     |
| 45 | Finland                                     | Developed               | EUR              | Yes             | 2008                     |
| 46 | the Former Yugoslavic Republic of Macedonia | Developing              | EUR              | Yes             | 2008                     |
| 47 | France                                      | Developed               | EUR              | Yes             | 2008                     |
| 48 | Gabon                                       | Developing              | AFR              | Yes             | 2008                     |
| 49 | Georgia                                     | Developing              | EUR              | Yes             | 2008                     |
| 50 | Germany                                     | Developed               | EUR              | Yes             | 2005                     |
| 51 | Ghana                                       | Developing              | AFR              | Yes             | 2008                     |
| 52 | Greece                                      | Developed               | EUR              | Yes             | 2008                     |
| 53 | Guatemala                                   | Developing              | AMR              | Yes             | 2007                     |
| 54 | Honduras                                    | Developing              | AMR              | Yes             | 2007                     |
| 55 | Hong Kong                                   | Developed               | WPR              | Yes             | 2007                     |
| 56 | Hungary                                     | Developing              | EUR              | Yes             | 2008                     |
| 57 | Iceland                                     | Developed               | EUR              | Yes             | 2008                     |
| 58 | India                                       | Developing              | SEAR             | Yes             | 2005                     |
| 59 | Indonesia                                   | Developing              | SEAR             | Yes             | 2007                     |
| 60 | Iran                                        | Developing              | EMR              | Yes             | 2007                     |
| 61 | Iraq                                        | Developing              | EMR              | No              |                          |
| 62 | Ireland                                     | Developed               | EUR              | Yes             | 2008                     |
| 63 | Israel                                      | Developed               | EUR              | Yes             | 2008                     |
| 64 | Italy                                       | Developed               | EUR              | Yes             | 2008                     |
| 65 | Jamaica <sup>a</sup>                        | Developing              | AMR              | Yes             | 2007                     |
| 66 | Japan                                       | Developed               | WPR              | Yes             | 2008                     |

|     |                                       |                         |              |     |      |
|-----|---------------------------------------|-------------------------|--------------|-----|------|
| 67  | Jordan                                | Developing              | EMR          | Yes | 2008 |
| 68  | Kazakhstan                            | Developing              | EUR          | No  |      |
| 69  | Kenya                                 | Developing              | AFR          | Yes | 2007 |
| 70  | Kuwait                                | Developing              | EMR          | Yes | 2007 |
| 71  | Kyrgyzstan                            | Developing              | EUR          | No  |      |
| 72  | Latvia                                | Developing              | EUR          | Yes | 2008 |
| 73  | Lebanon                               | Developing              | EMR          | Yes | 2007 |
| 74  | Libya                                 | Developing              | EMR          | Yes | 2007 |
| 75  | Lithuania                             | Developing              | EUR          | Yes | 2008 |
| 76  | Luxembourg                            | Developed               | EUR          | Yes | 2008 |
| 77  | Madagascar <sup>a</sup>               | Developing              | AFR          | Yes | 2008 |
| 78  | Malaysia                              | Developing              | WPR          | Yes | 2008 |
| 79  | Maldives <sup>a</sup>                 | Developing              | SEAR         | Yes | 2005 |
| 80  | Mali                                  | Developing              | AFR          | Yes | 2008 |
| 81  | Malta                                 | Developed               | EUR          | No  |      |
| 82  | Mauritania                            | Developing              | AFR          | Yes | 2008 |
| 83  | Mauritius                             | Developing              | AFR          | Yes | 2008 |
| 84  | Mexico                                | Developing              | AMR          | Yes | 2007 |
| 85  | Moldova                               | Developing              | EUR          | Yes | 2008 |
| 86  | Morocco                               | Developing              | EMR          | Yes | 2007 |
| 87  | Myanmar                               | Developing              | SEAR         | Yes | 2005 |
| 88  | Nepal                                 | Developing              | SEAR         | Yes | 2007 |
| 89  | Netherlands                           | Developed               | EUR          | Yes | 2008 |
| 90  | New Zealand                           | Developed               | WPR          | Yes | 2008 |
| 91  | Nicaragua                             | Developing              | AMR          | Yes | 2007 |
| 92  | Nigeria                               | Developing              | AFR          | Yes | 2008 |
| 93  | Norway                                | Developed               | EUR          | Yes | 2008 |
| 94  | Oman                                  | Developing              | EMR          | Yes | 2007 |
| 95  | Pakistan                              | Developing              | EMR          | Yes | 2008 |
| 96  | Panama                                | Developing              | AMR          | Yes | 2007 |
| 97  | Paraguay                              | Developing              | AMR          | Yes | 2007 |
| 98  | Peru                                  | Developing              | AMR          | Yes | 2005 |
| 99  | Philippines                           | Developing              | WPR          | Yes | 2007 |
| 100 | Poland                                | Developing              | EUR          | Yes | 2008 |
| 101 | Portugal                              | Developed               | EUR          | Yes | 2008 |
| 102 | Puerto Rico <sup>a</sup>              | Developing <sup>b</sup> | AMR          | Yes | 2007 |
| 103 | Qatar                                 | Developing              | EMR          | Yes | 2005 |
| 104 | Romania                               | Developing              | EUR          | Yes | 2008 |
| 105 | Russia                                | Developing              | EUR          | Yes | 2008 |
| 106 | Saint Lucia <sup>a</sup>              | Developing              | AMR          | Yes | 2007 |
| 107 | Saudi Arabia                          | Developing              | EMR          | Yes | 2008 |
| 108 | Senegal                               | Developing              | AFR          | Yes | 2007 |
| 109 | Serbia and Montenegro                 | Developing              | EUR          | Yes | 2004 |
| 110 | Singapore                             | Developed               | WPR          | Yes | 2005 |
| 111 | Slovakia                              | Developing              | EUR          | Yes | 2008 |
| 112 | Slovenia                              | Developed               | EUR          | Yes | 2008 |
| 113 | South Africa                          | Developing              | AFR          | Yes | 2007 |
| 114 | South Korea                           | Developed               | WPR          | Yes | 2008 |
| 115 | Spain                                 | Developed               | EUR          | Yes | 2008 |
| 116 | Sri Lanka                             | Developing              | SEAR         | Yes | 2005 |
| 117 | Sudan                                 | Developing              | EMR          | Yes | 2007 |
| 118 | Swaziland <sup>a</sup>                | Developing              | AFR          | Yes | 2008 |
| 119 | Sweden                                | Developed               | EUR          | Yes | 2008 |
| 120 | Switzerland                           | Developed               | EUR          | Yes | 2007 |
| 121 | Syria                                 | Developing              | EMR          | Yes | 2006 |
| 122 | Taiwan                                | Developed               | <sup>c</sup> | Yes | 2008 |
| 123 | Tanzania <sup>a</sup>                 | Developing              | AFR          | Yes | 2008 |
| 124 | Thailand                              | Developing              | SEAR         | Yes | 2007 |
| 125 | Togo                                  | Developing              | AFR          | Yes | 2008 |
| 126 | Trinidad and Tobago                   | Developing              | AMR          | Yes | 2007 |
| 127 | Tunisia                               | Developing              | EMR          | Yes | 2008 |
| 128 | Turkey                                | Developing              | EUR          | Yes | 2008 |
| 129 | Turkmenistan                          | Developing              | EUR          | No  |      |
| 130 | Turks and Caicos Islands <sup>a</sup> | Developing <sup>b</sup> | AMR          | Yes | 2007 |
| 131 | Ukraine                               | Developing              | EUR          | Yes | 2008 |
| 132 | United Arab Emirates                  | Developing              | EMR          | Yes | 2008 |
| 133 | United Kingdom                        | Developed               | EUR          | Yes | 2008 |
| 134 | United States of America              | Developed               | AMR          | Yes | 2008 |
| 135 | Uruguay                               | Developing              | AMR          | Yes | 2008 |
| 136 | Uzbekistan                            | Developing              | EUR          | Yes | 2008 |
| 137 | Venezuela                             | Developing              | AMR          | Yes | 2007 |
| 138 | Viet Nam                              | Developing              | WPR          | Yes | 2008 |
| 139 | Yemen                                 | Developing              | EMR          | Yes | 2007 |

AFR, African Region; AMR, Americas Region; EMR, East Mediterranean Region; EUR, European Region; SEAR, South East Asia Region; WPR, West Pacific Region

<sup>a</sup> Indicates nations reporting dialysis use not identified by Grassmann et al. <sup>18</sup>

<sup>b</sup> Indicates a non-member nation of the International Monetary Fund. <sup>19</sup> Classifications based on Central Intelligence Agency guidelines. <sup>39</sup>

<sup>c</sup> Indicates a non-member nation of the World Health Organization. <sup>40</sup>

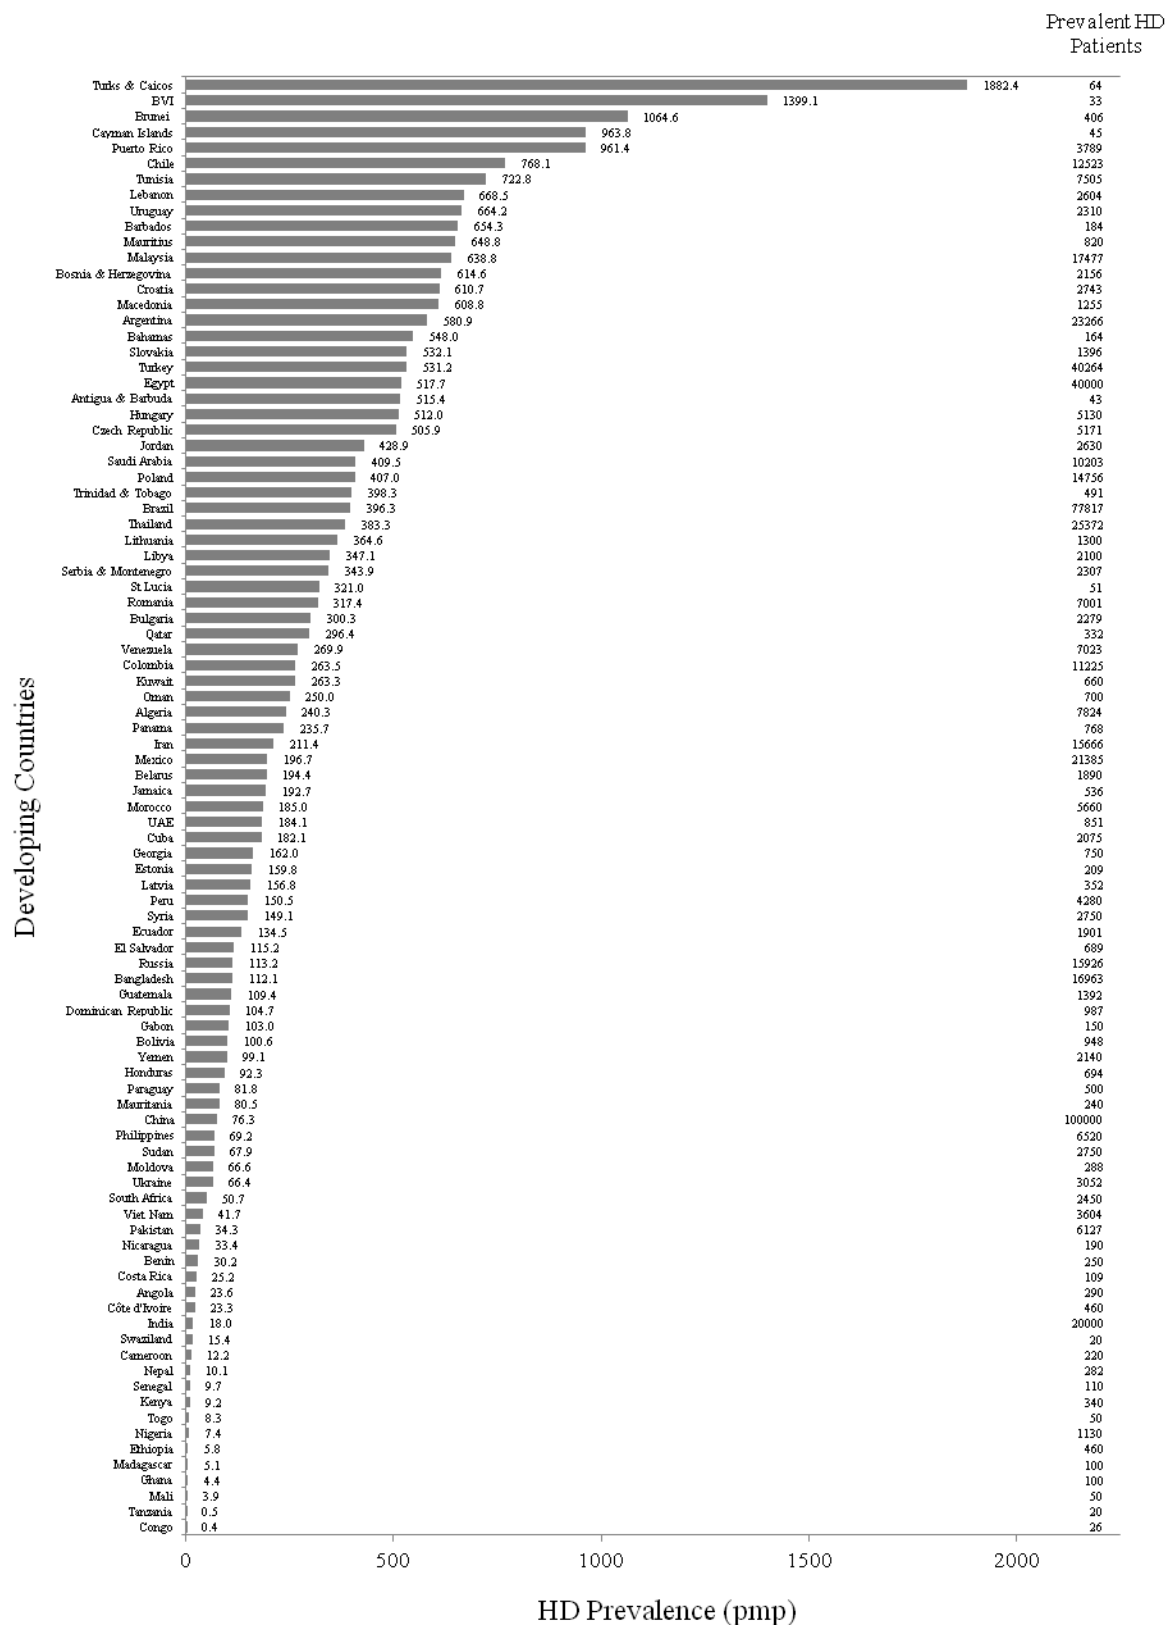

Appendix Figure 1a. HD prevalence in developing countries according to most recent data

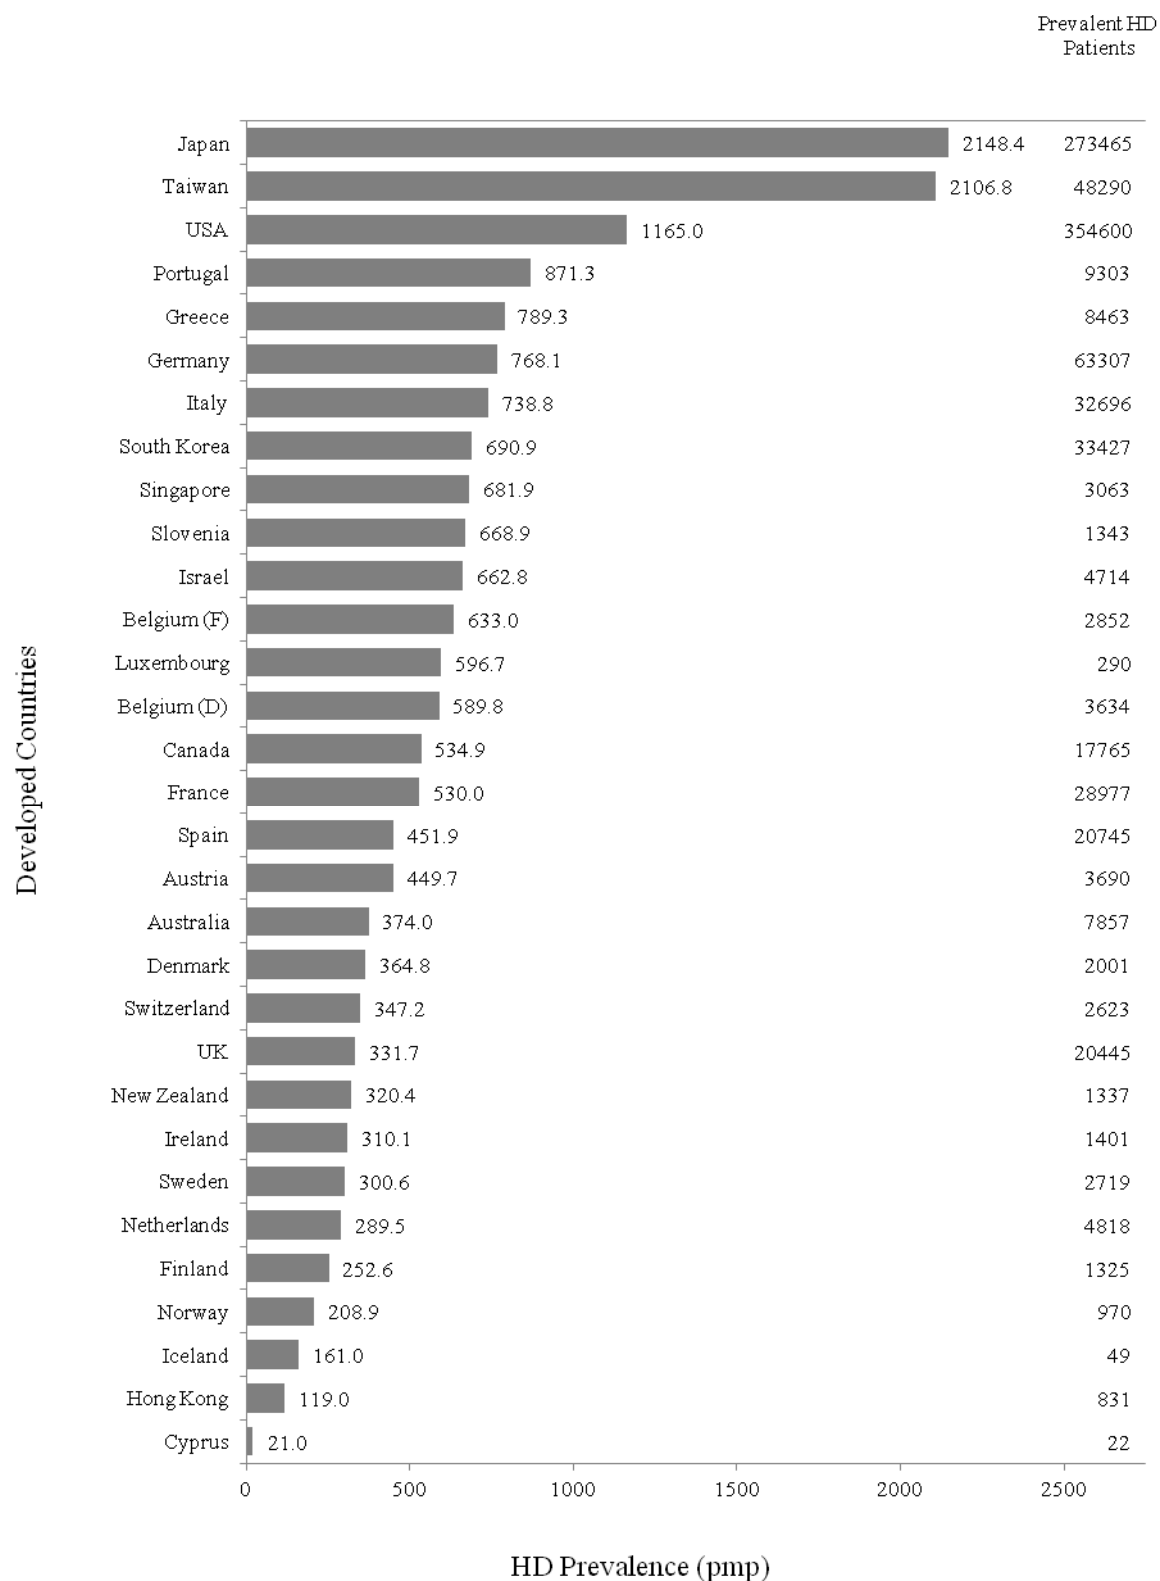

Appendix Figure 1b. HD prevalence in developed countries according to most recent data

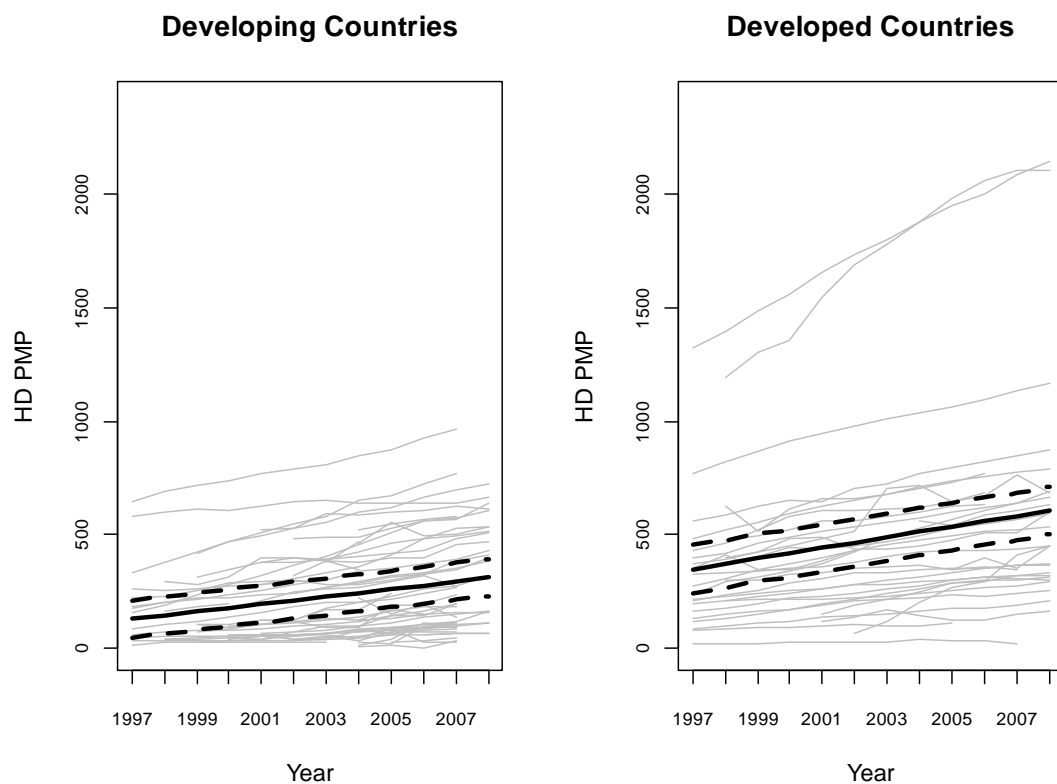

Appendix Figure 2. Trends in the prevalence of hemodialysis per million population from 1997 to 2008 in developing and developed countries. The grey lines represent trends in individual countries, and the black lines the overall trend with 95% confidence intervals.

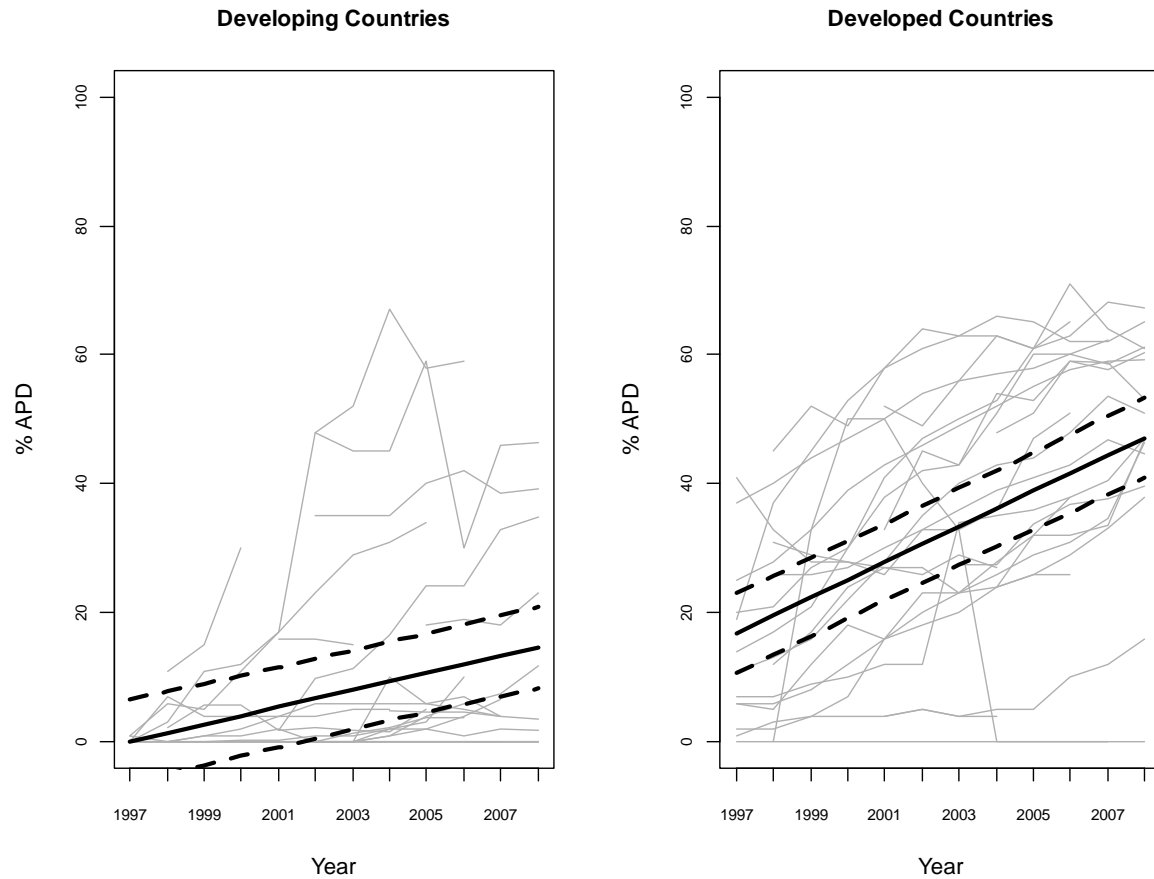

Appendix Figure 3. Trends in the proportion of peritoneal dialysis patients treated with automated peritoneal dialysis (APD) from 1997 to 2008 in developing and developed countries. The grey lines represent trends in individual countries, and the black lines the overall trend with 95% confidence intervals.

## **Assessment of total dialysis population growth**

To assess growth in the crude number of prevalent PD and HD patients worldwide, we summed the total number of dialysis patients from countries reporting annual data from 1999 to 2006.

### *Results*

In total, 46 countries reported sufficient data to assess trends in the global PD population. From 1999 to 2006, there was a steady increase in the crude number of patients using PD worldwide:  
n = 75 125 (year 1999); n = 77 264 (year 2000); n = 80 988 (year 2001); n = 83 124 (year 2002);  
n = 90 813 (year 2003); n = 95 535 (year 2004); n = 99 616 (year 2005); n = 101 826 (year 2006).

Similarly, we assessed trends in HD growth using data reported from 46 countries. From 1999 to 2006, there was an increase in the number of prevalent HD patients: n = 690 732 (year 1999);  
n = 736 269 (year 2000); n = 788 718 (year 2001); n = 831 196 (year 2002); n = 890 661 (year 2003);  
n = 937 580 (year 2004); n = 973 377 (year 2005); n = 1 016 727 (year 2006).
